# Supplementary material
Source: PubMed Central journal article supplement (PMC7403722)
Supplement: EMBR-21-e48779-s001.pdf [file EMBR-21-e48779-s001.pdf]

## Expanded View Figures

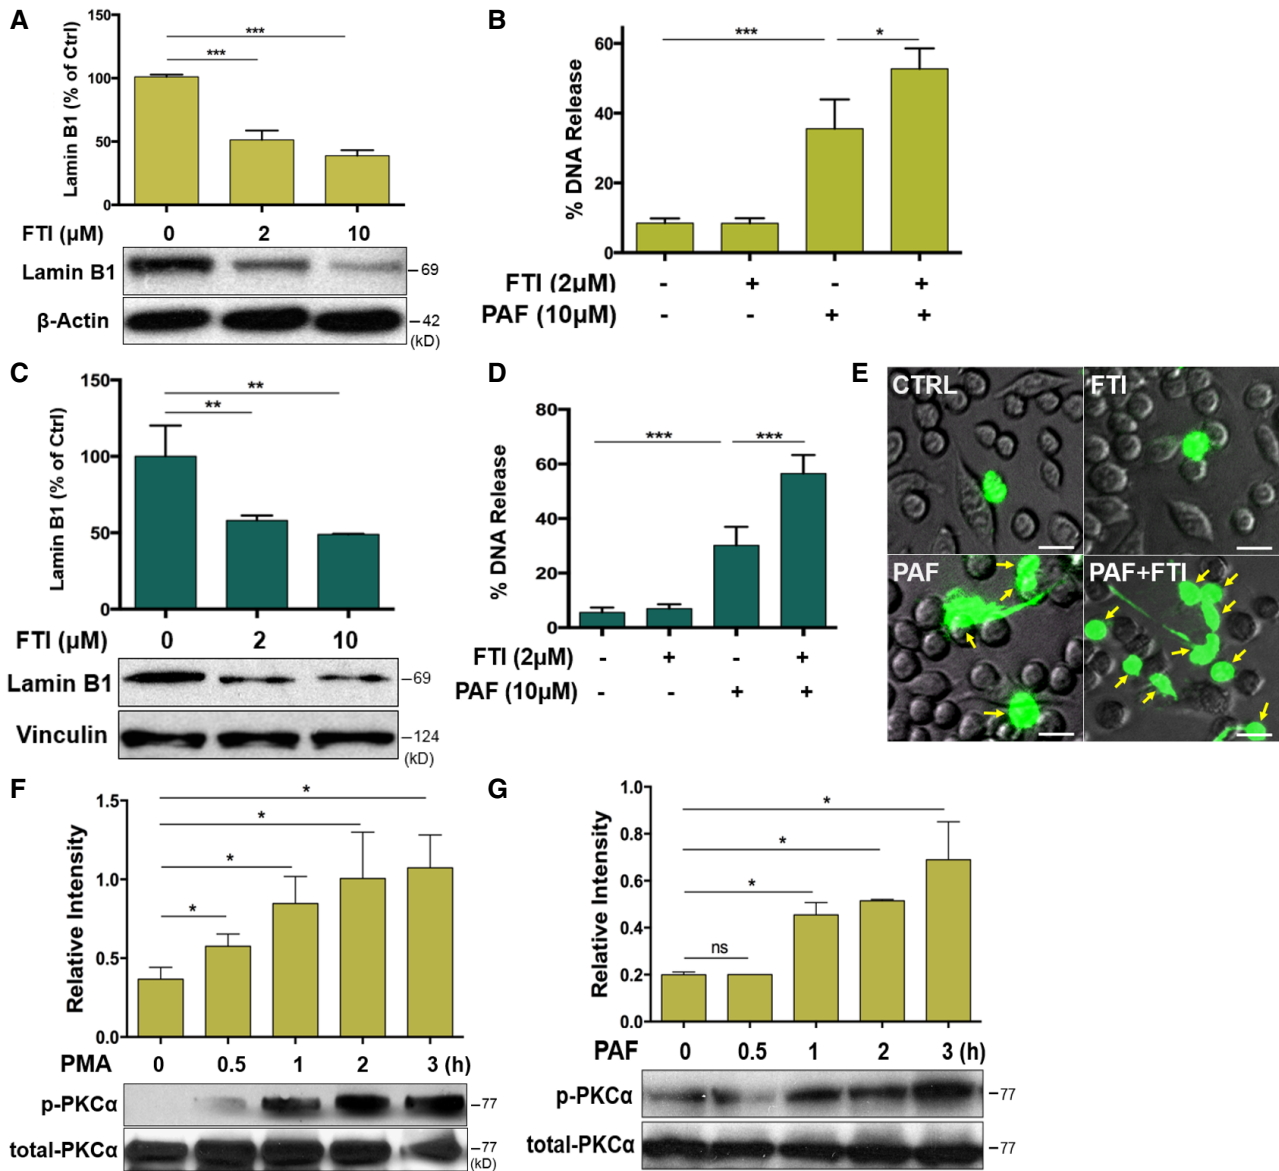

**Figure EV1. Decreased lamin B expression enhances extracellular traps formation *in vitro* and time course of PKC $\alpha$  phosphorylation during NET formation (Related to Figs 1 and 3).**

A, C Summary and representative immunoblot analysis for the mature lamin B expression in HL-60 dPMNs (A) or RAW264.7 cells (C) that were treated without (0) or with 2 or 10  $\mu\text{M}$  farnesyltransferase inhibitor (FTI) L-744,832 for 48 h.

B, D, E Summary analysis (B, D) and representative images (E) of extracellular trap release in HL-60 dPMNs (B) RAW264.7 cells (E) that were pretreated without or with 2  $\mu\text{M}$  for 48 h, followed by treatment or not with 10  $\mu\text{M}$  PAF for 3 h and then stained with cell-impermeable SYTOX Green, without fixation. Fluorescent and phase-contrast images were taken by Olympus confocal microscopy. The yellow arrows indicate neutrophils with NET formation. Scale bars, 20  $\mu\text{m}$  (E).

F, G Representative immunoblots and the summary analyses of total and phosphorylated PKC $\alpha$  (p-PKC $\alpha$ ), in human dPMNs that were treated either by PMA (F) or PAF (G) for 0, 0.5, 1, 2, 3 h.

Data information: The summary analyses were calculated based on the arbitrary density of immunoblot images (A, C, F, G), or % DNA release index was analyzed by comparison of the fluorescent intensity of the indicated conditions to an assigned value of 100% for the total DNA released by neutrophils lysed by 0.5% (*v/v*) Triton X-100 (B, D) as compared to their untreated controls. Data are given as mean  $\pm$  SD from at least three independent biological replicates. \* $P < 0.05$ , \*\* $P < 0.01$ , \*\*\* $P < 0.001$  between different groups as indicated. Comparisons among three or more groups were performed using ANOVA, followed by Student–Newman–Keuls test.

Source data are available online for this figure.

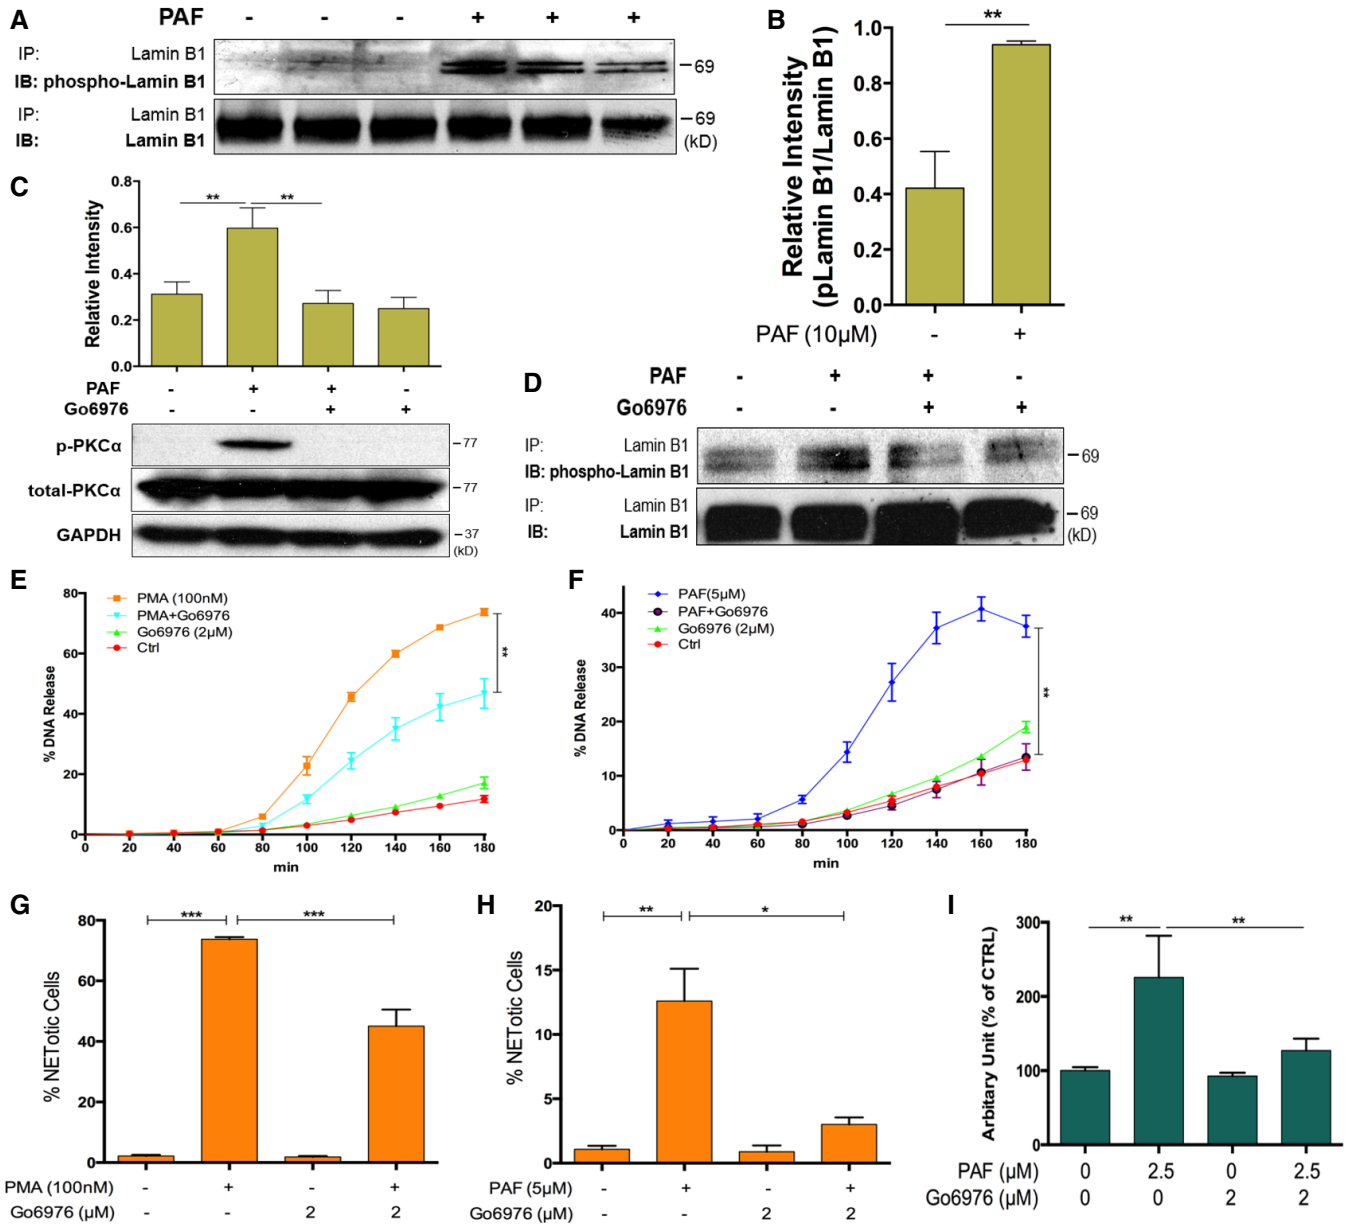

Figure EV2.

**Figure EV2. Inhibition of PKC $\alpha$  phosphorylation attenuated Lamin B1 phosphorylation and alleviated extracellular trap formation. (Related to Figs 4 and 5).**

- A, B Representative and summary immunoblot (IB) detection of phospho-lamin B and total lamin B with the lamin B protein purified by immunoprecipitation (IP) with anti-lamin B from human dPMNs that were treated either by PAF (A, B) for 0 or 3 h.
- C Summary and representative immunoblots of the total PKC $\alpha$  and p-PKC $\alpha$  in dPMNs that were pretreated without or with PKC inhibitor Go6976 for 1 h and then treated without or with PAF (B) for 3 h.
- D Representative immunoblot (IB) detection of the phospho-lamin B and total lamin B with lamin B protein purified by immunoprecipitation (IP) with anti-lamin B from human dPMNs that were pretreated without or with PKC inhibitor Go6976 for 1 h and then treated either by PAF (D) for 3 h.
- E, F The kinetic analysis of NET-DNA release index was determined by cocubation of primary human pPMNs that were pretreated without or with PKC $\alpha$  inhibitor Go6976 for 1 h and then treated without (control) or with 100 nM PMA (E) or 5  $\mu$ M PAF (F) in medium containing 1  $\mu$ M SYTOX Green dye for 3 h with recording by a microplate reader for every 20 min. The NET-DNA release index was reported in comparison with an assigned value of 100% for the total DNA released by neutrophils lysed by 0.5% (*v/v*) Triton X-100.
- G, H Summary analysis of PMA (G)- or PAF (H)-induced NET formation in pPMNs that were stimulated without or with 100 nM PMA or 5  $\mu$ M PAF for 3 h and stained with both cell-permeable SYTO Red and cell-impermeable SYTOX Green, without fixation. Images were taken by Olympus confocal microscopy, followed by automated quantification of NETs on 5–6 non-overlapping area per well using ImageJ for calculation of % NETotic cells.
- F Summary analyses of extracellular trap formation in RAW264.7 cells that were pretreated without or with PKC $\alpha$  inhibitor Go6976 for 1 h and then treated without or with PAF (I) for 3 h. Then, the plates were analyzed with microplate reader for fluorometric NET quantification.

Data information: Comparison between two groups was analyzed by the Student *t* test for panel (B) from 3 independent experiments. The summary analyses of panels (C, E–I) were calculated based on the arbitrary unit (E), or NET-DNA release index (G, H), or % NETotic cell (E, F), or arbitrary fluorescent unit (I) from at least 3 independent biological replicates. Data are given as mean  $\pm$  SD. \**P* < 0.05, \*\**P* < 0.01, \*\*\**P* < 0.001 between groups as indicated. Comparisons among three or more groups were analyzed using ANOVA, followed by Student–Newman–Keuls test.

Source data are available online for this figure.

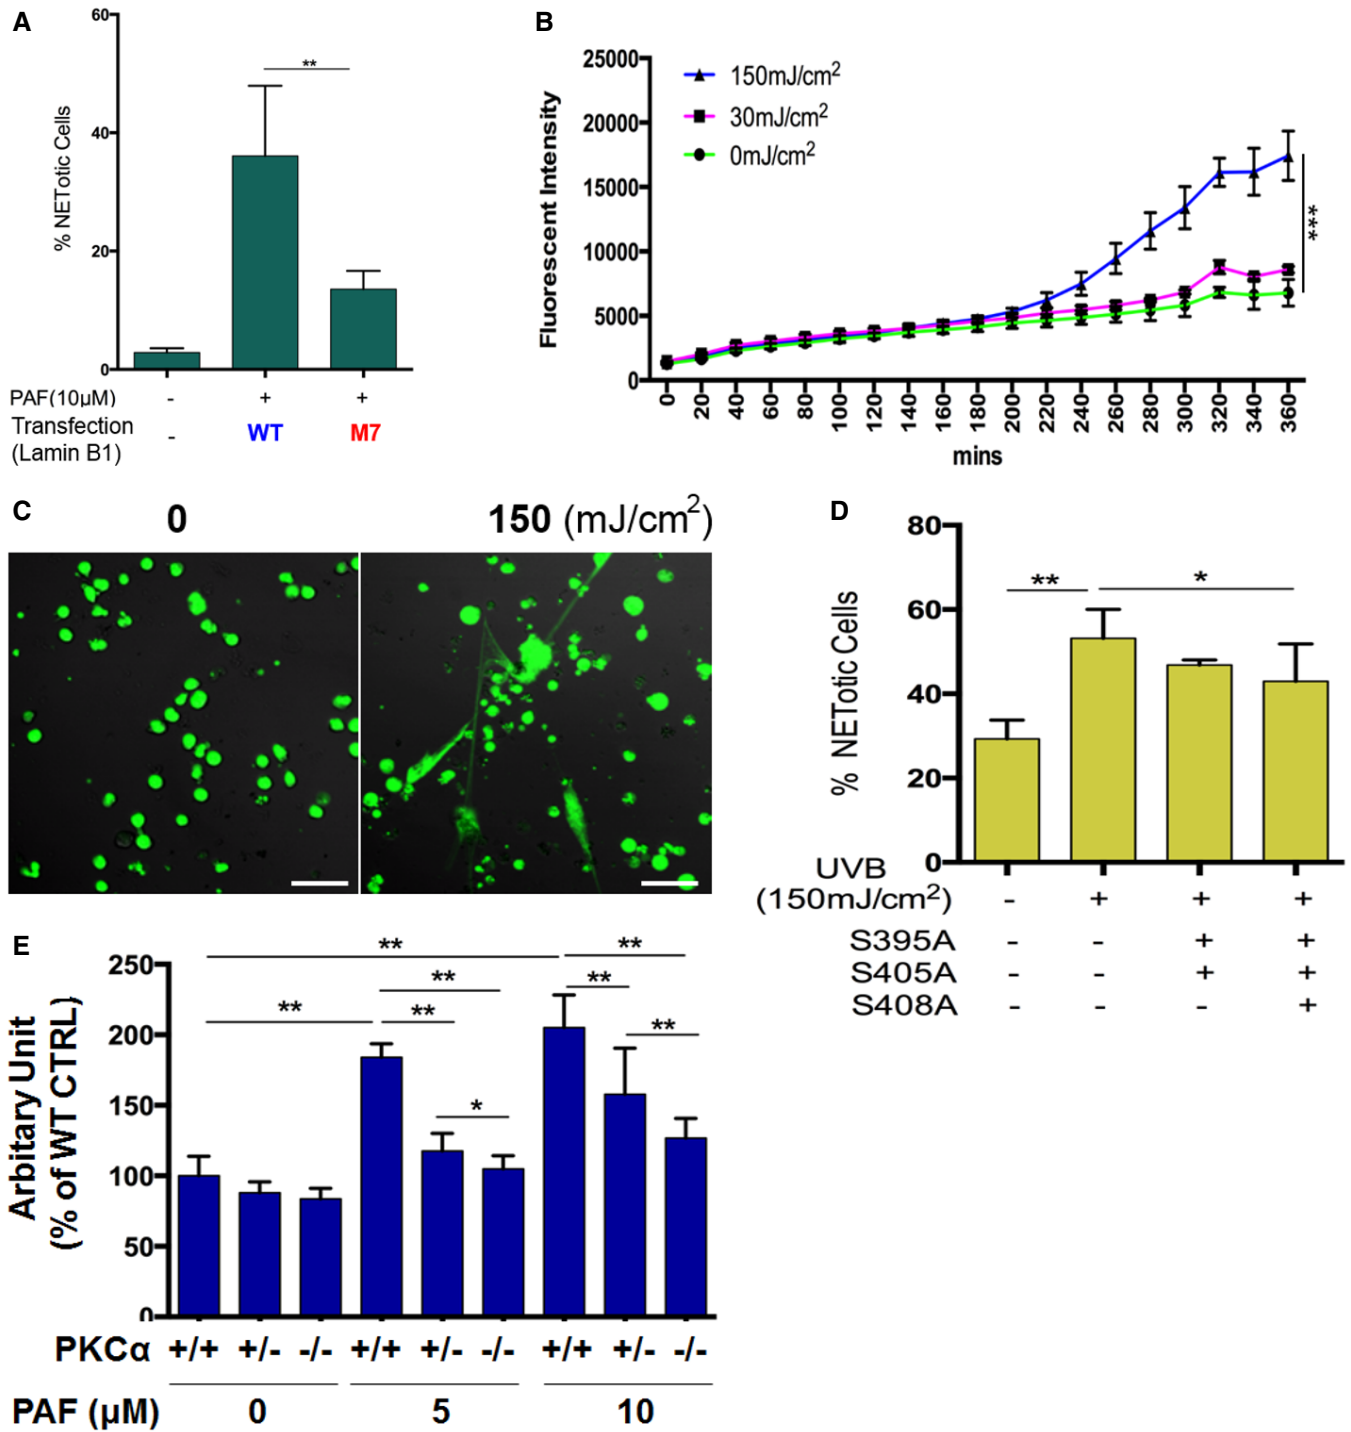

Figure EV3.

**Figure EV3. Mutation of PKC $\alpha$  phosphorylation site in lamin B or PKC $\alpha$  deficiency impaired extracellular trap formation-induced by PAF or UVB irradiation (Related to Figs 5 and 6).**

- A Summary analysis of extracellular trap formation in the RAW264.7 cells that were transfected with plasmids of either wild-type lamin B (WT control), or the M7 mutant of PKC $\alpha$ -consensus phosphorylation sites (S395A/S405A/S408A) of lamin B, and treated by 10  $\mu$ M PAF for 3 h. The cells were stained by cell-impermeable dye SYTOX Green (500 nM), and the total cells were detected by staining with cell-permeable dye SYTO Red (500 nM). Images were taken by Olympus confocal microscopy, followed by automated quantification of NETs using ImageJ for quantification of % cells with extracellular trap release. RAW264.7 cells without transfection and without PAF treatment were served as basal control.
- B, C Summary (B) and representative (C) analysis of NET formation in dPMNs that were irradiated without or with UVB at 30 or 150 mJ/cm<sup>2</sup>, in medium containing 1  $\mu$ M SYTOX Green dye for 6 h with recording every 20 min by a microplate reader for up to 6 h. Then, the plates were analyzed with microplate reader for fluorometric NET quantification. Scale bar, 50  $\mu$ m.
- D Summary analyses of NET formation in the dPMNs that were transfected with plasmids of either wild-type lamin B (WT control for the left two columns), or the M4 or M7 mutants and then were irradiated without or with UVB at 150 mJ/cm<sup>2</sup>. Then, the staining and quantification of % NETotic cells were conducted as described in panel (A).
- E Summary analyses of NET formation in mouse bone marrow mPMNs, from WT, heterozygous, or homozygous PKC $\alpha$ -deficient mice, which were treated without or with either 5 or 10  $\mu$ M of PAF for 3 h, following by fluorometric NET quantification analysis. Data information: The panels (A, B, D) were calculated based on at least 3 independent biological replicates. Panel (E) is a summary analysis that was calculated based on the arbitrary fluorescent unit from 3 independent biological replicates. Data are given as mean  $\pm$  SD. \* $P$  < 0.05, \*\* $P$  < 0.01, \*\*\* $P$  < 0.001 between groups as indicated. Comparisons among three or more groups were analyzed using ANOVA, followed by Student–Newman–Keuls test.

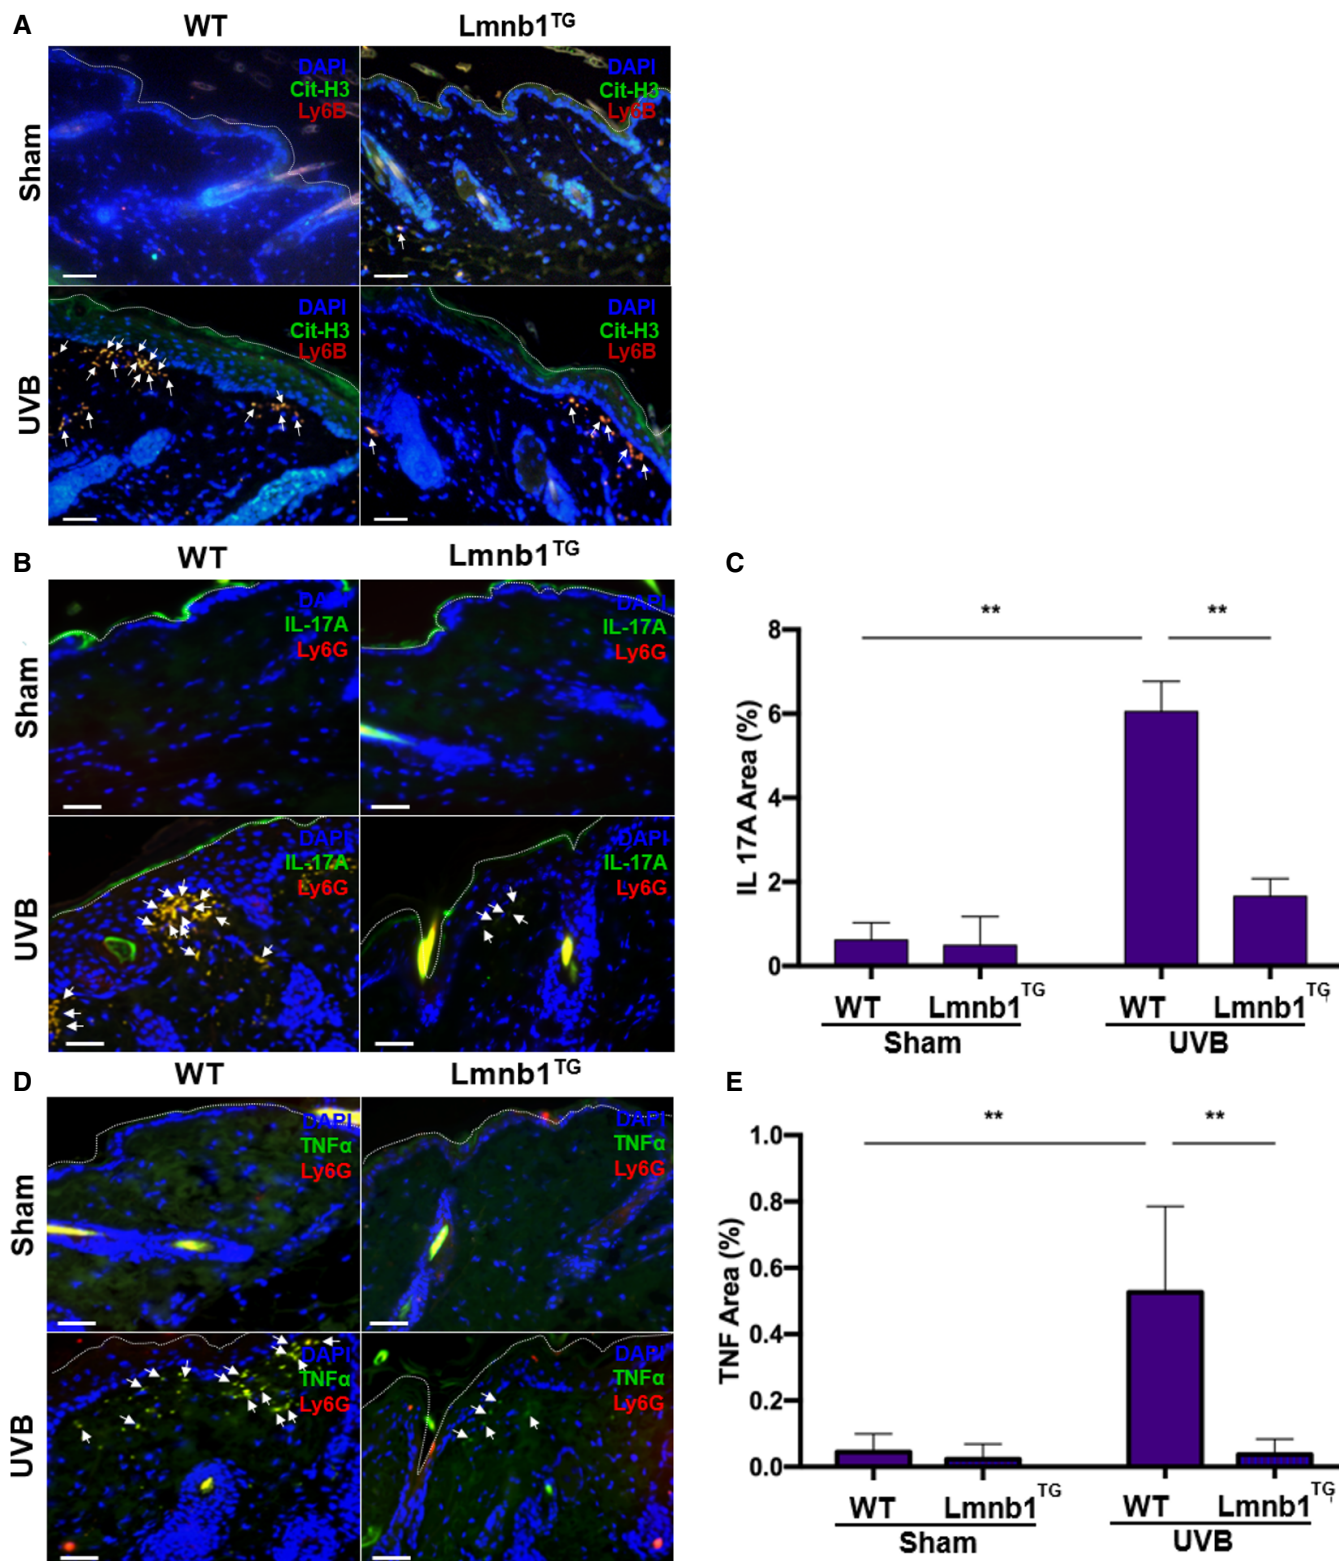

Figure EV4.

**Figure EV4. Lamin B overexpression decreased NET release and alleviated exhibition of NET-associated proinflammatory cytokines in skin of lamin B1 transgenic mice after UVB irradiation (Related to Fig 7).**

A–E Fluorescent staining of the skin tissues from *LmnB1<sup>TG</sup>* mice and their WT littermates that were irradiated or not (sham) by UVB. (A) The citrullinated histone H3 was probed by rabbit anti-mouse citrullinated histone H3, following stained by Alexa Fluor-488-labeled donkey anti-rabbit secondary antibody, while neutrophil marker was probed by rat anti-mouse Ly6B Ab following stained by Alexa Fluor-647 conjugated goat anti-rat secondary antibody. (B–E) The representative (B, D) or summary (C, E) analysis of neutrophil surface marker Ly6G was stained by PE-conjugated rat anti-mouse Ly6G Ab. FITC-labeled rat anti-mouse IL-17A antibody was used to detect IL-17A. FITC-labeled rat anti-mouse TNF- $\alpha$  antibody was used to detect TNF- $\alpha$ . DNA was stained by DAPI for or panel (A–E).

Data information: White arrows indicate neutrophils with NET formation (A) or NETs with IL-17A (B, C) or TNF- $\alpha$  (D, E) display in skin. Scale bar, 100  $\mu$ m. The panels (C, E) were calculated based on 3–4 individual mice ( $n = 3–4$  biological replicates). Data are given as mean  $\pm$  SD. **\*\* $P < 0.01$** , between groups as indicated. Comparisons among three or more groups were analyzed using ANOVA, followed by Student–Newman–Keuls test.



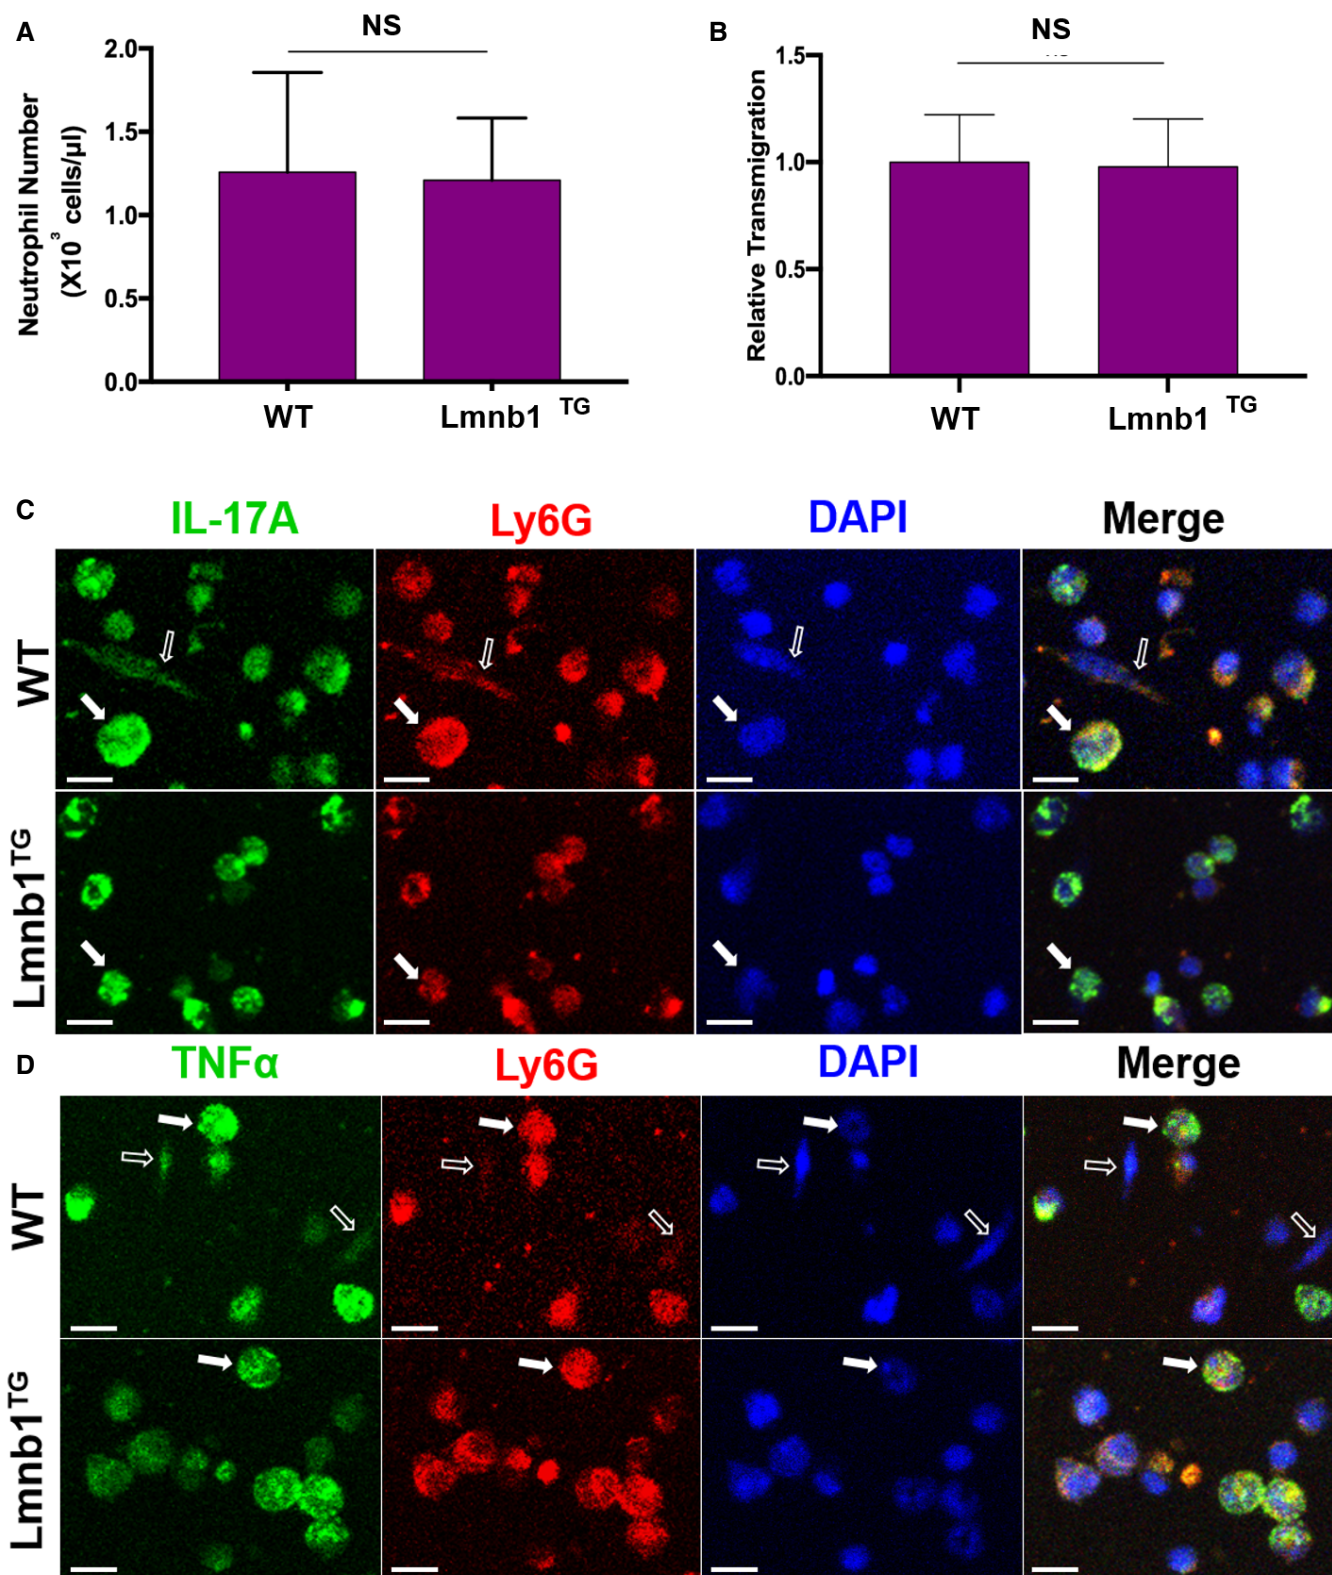

Figure EV5.



**Figure EV5. Features of neutrophil counts in peripheral blood, transmigration ability and cytokine expression in neutrophils from *Lmnb1<sup>TC</sup>* vs WT mice.**

- A Neutrophil counts in peripheral blood from *Lmnb1<sup>TC</sup>* mice and their WT littermates ( $n = 4$  biological replicates).
- B Relative transmigration was measured using Boyden chamber with pore size of  $3.0 \mu\text{m}$ . The pore transmigration ability in neutrophils from the *Lmnb1<sup>TC</sup>* mice was expressed as relative transmigration compared to that in neutrophils from WT littermates ( $n = 3$  biological replicates).
- C, D The bone marrow neutrophils from *Lmnb1<sup>TC</sup>* mice and their WT littermates were treated with  $10 \mu\text{M}$  PAF for 16 h and then fixed with 2% PFA and permeabilized with 0.1% Triton X-100, following immunocytochemistry staining. The neutrophil surface marker Ly6G was stained by PE-conjugated rat anti-mouse Ly6G Ab. FITC-labeled rat anti-mouse IL-17A antibody or FITC-labeled rat anti-mouse TNF- $\alpha$  antibody was used to detect IL-17A or TNF- $\alpha$ . DNA was stained by DAPI for or panels (C, D).

Data information: Panels (A, B) are summary analysis that was calculated based on neutrophil counts of the blood slides with May-Grünwald-Giemsa staining (A), the arbitrary fluorescent unit of SYTOX Green staining of the lysed neutrophils that transmigrated to the bottom chamber of the 24-well transwell plates, from at least 3 independent biological replicates (B). The differences between groups  $P > 0.05$  are indicated as no significant difference (NS). Data are given as mean  $\pm$  SD.

Comparisons were calculated by the Student  $t$  test.
