# Supplementary material
Source: PubMed Central journal article supplement (PMC7403722)

# Source data for Figure 2A

 Cropped area

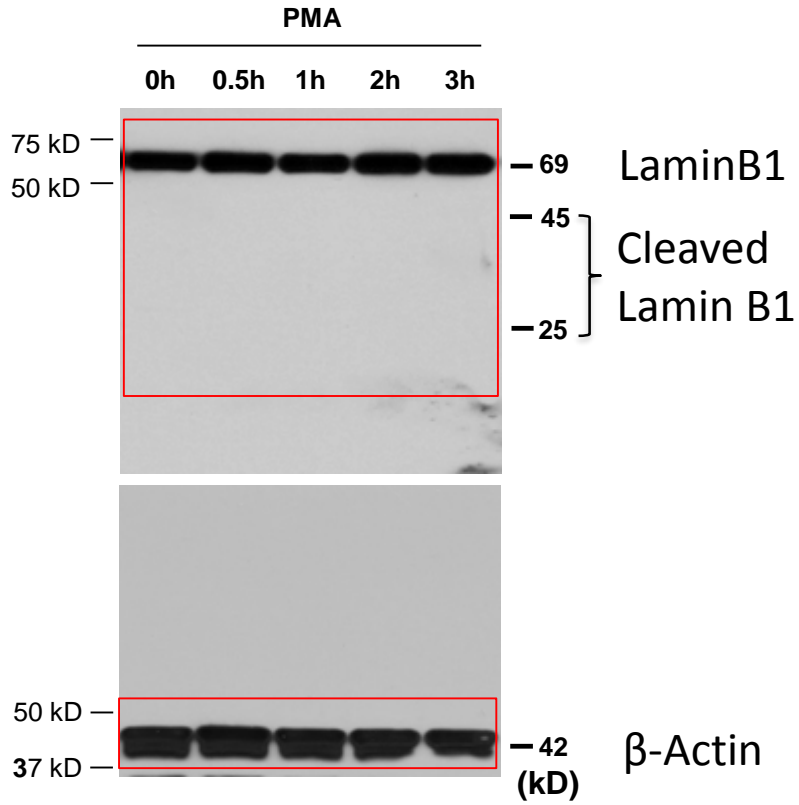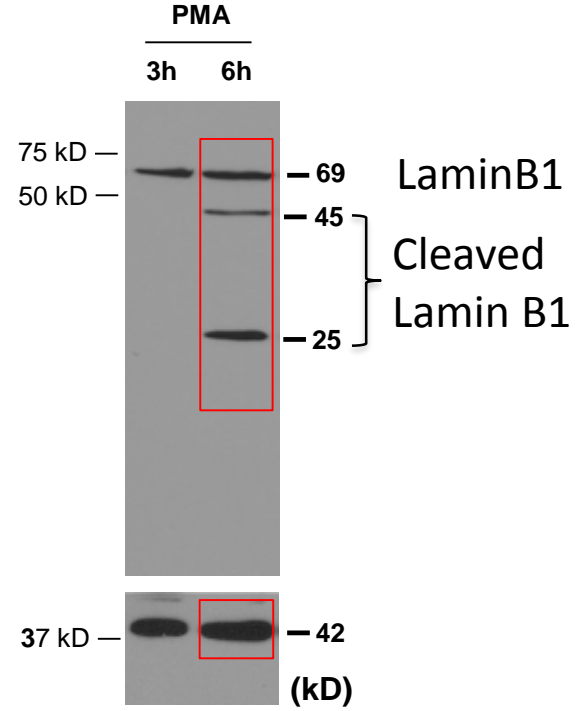

# Source data for Figure 2C,E

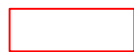

Cropped area

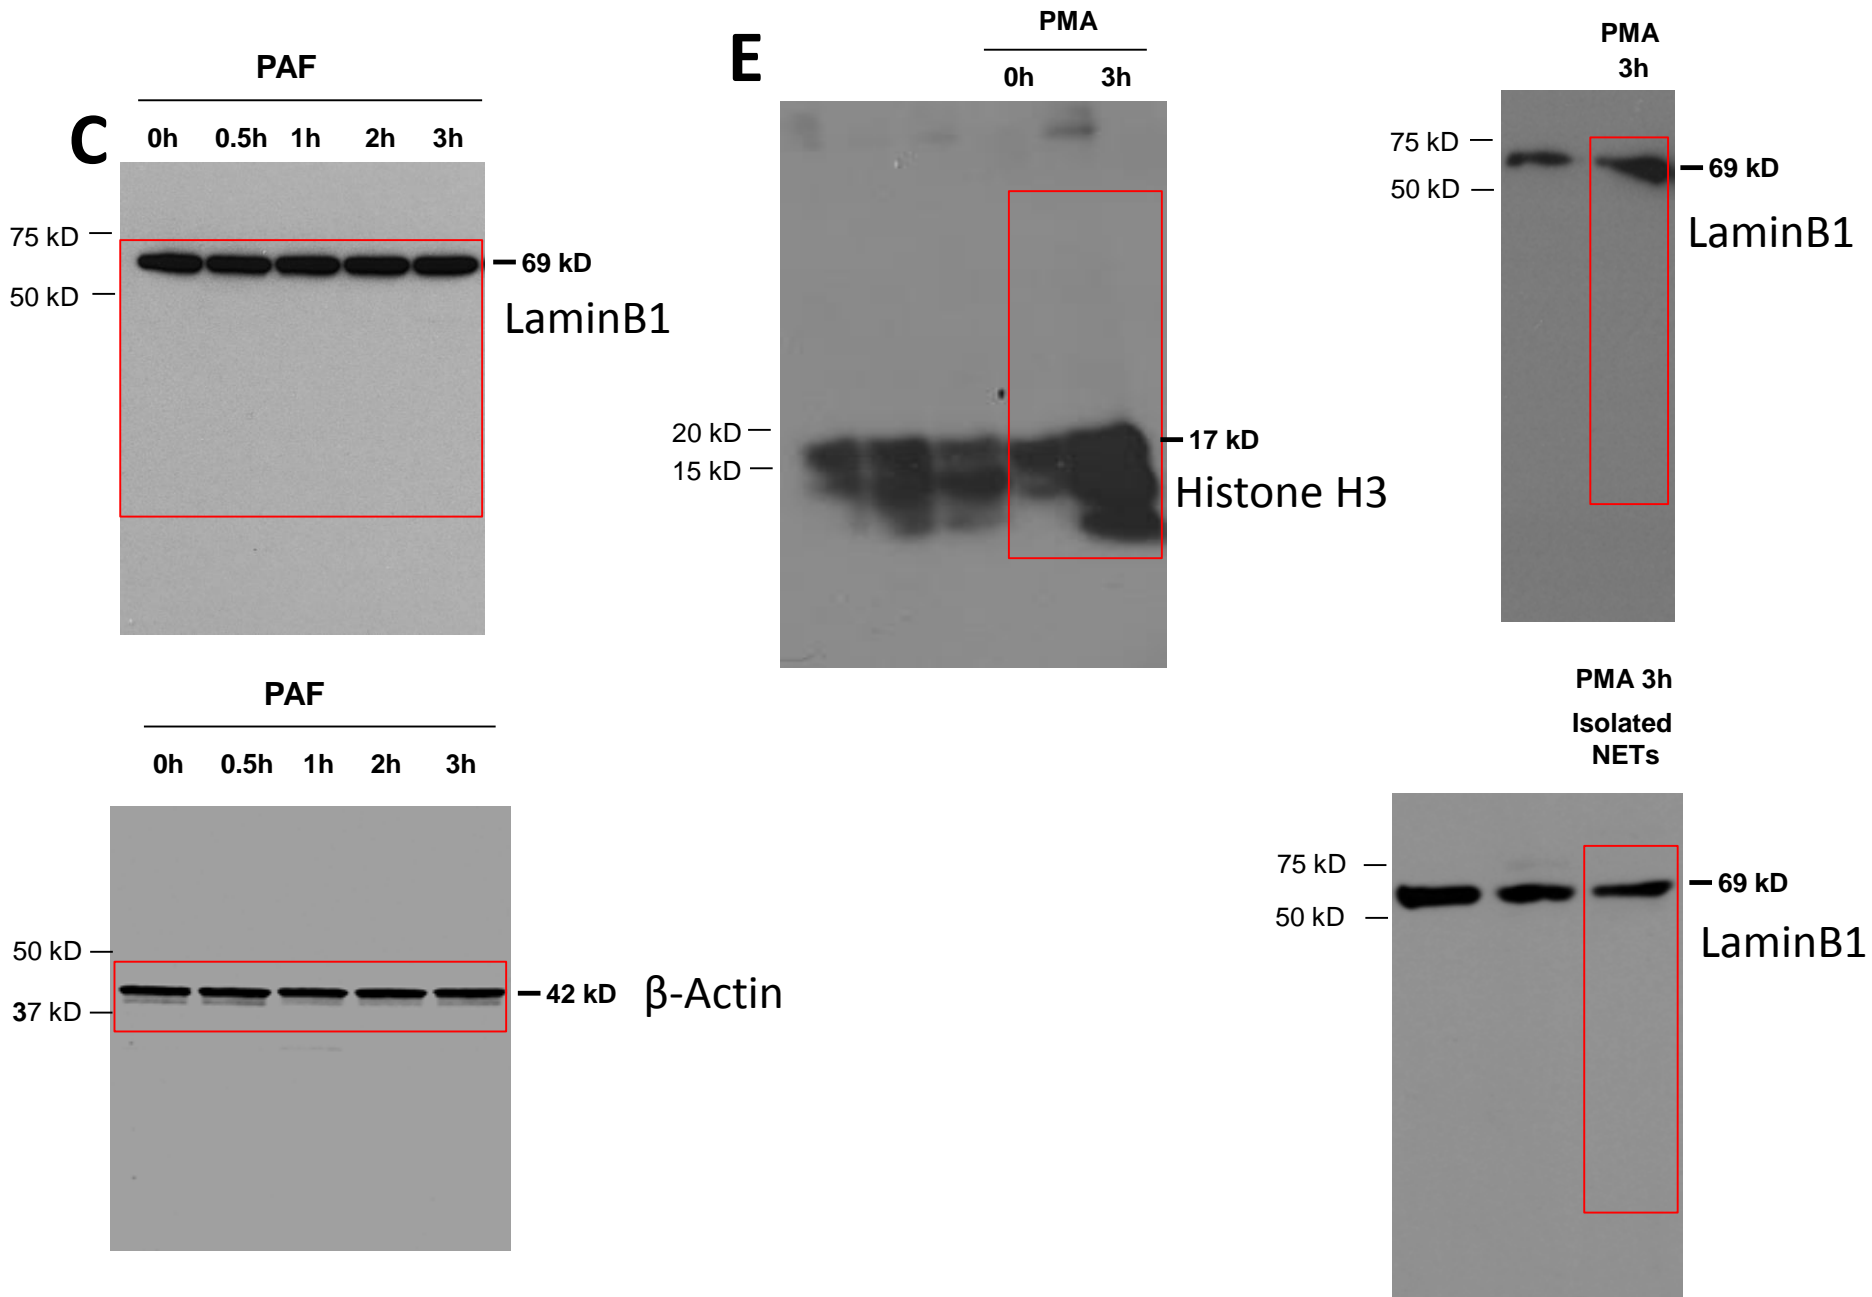

# Source data for Figure 2F

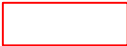

Cropped area

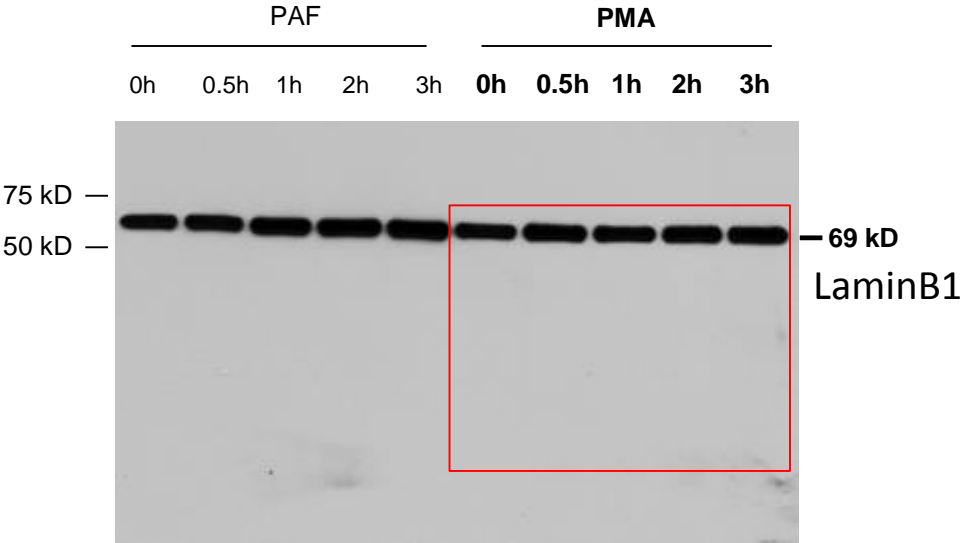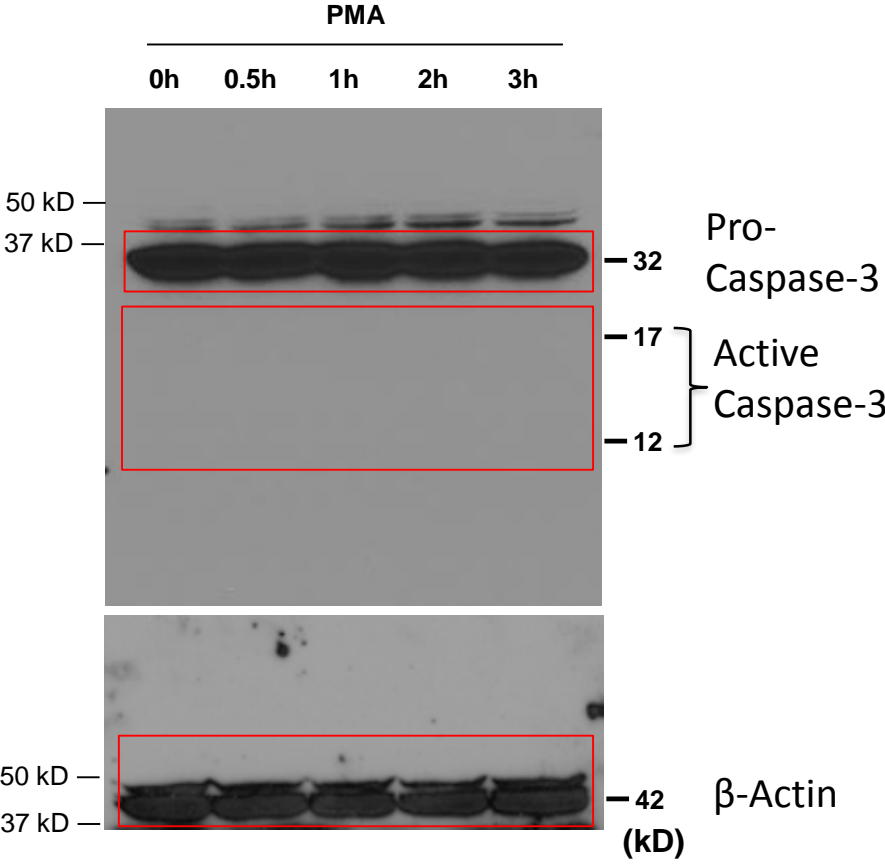

# Source data for Figure 2G

 Cropped area

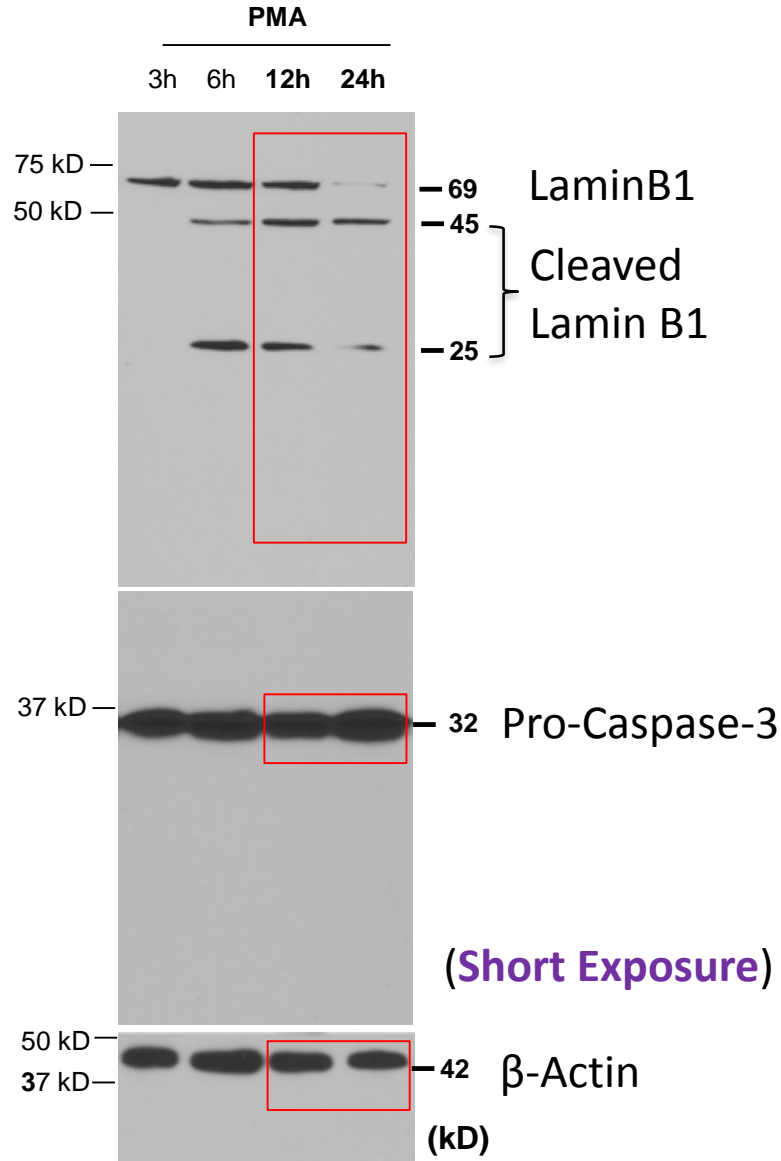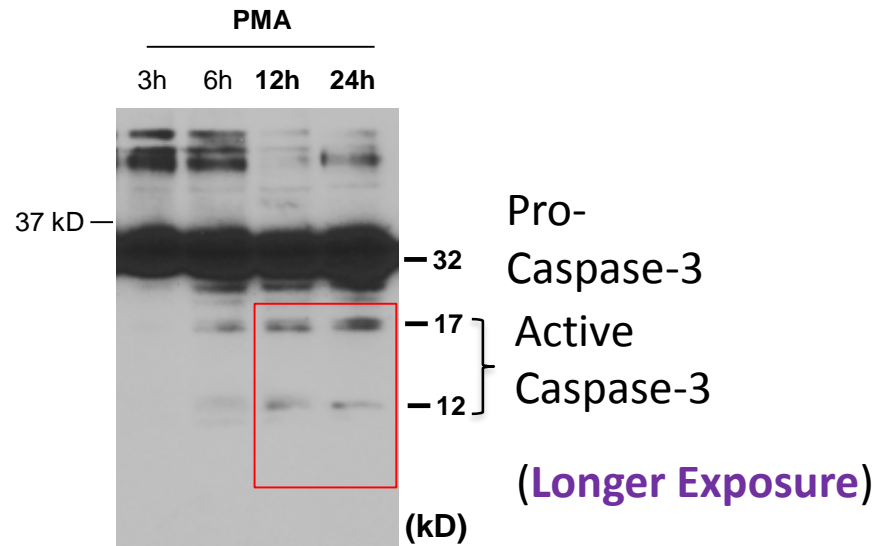

Supplement: EMBR-21-e48779-s003.pdf [file EMBR-21-e48779-s003.pdf]
