# Supplementary material
Source: PubMed Central journal article supplement (PMC7403722)

# Source data for Figure 1D

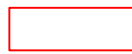

Cropped area

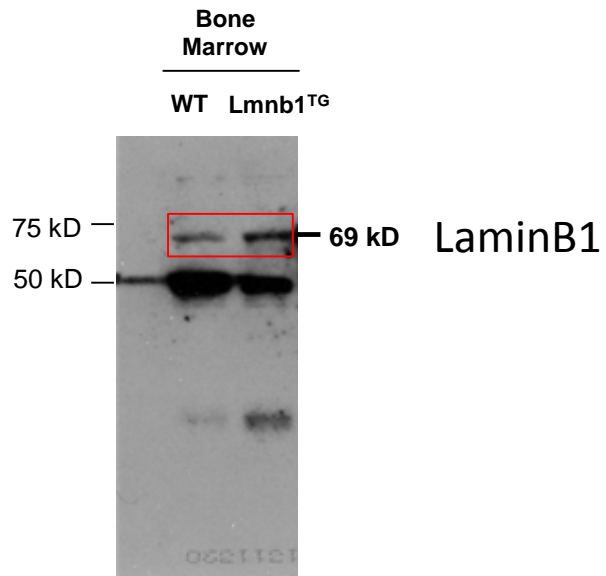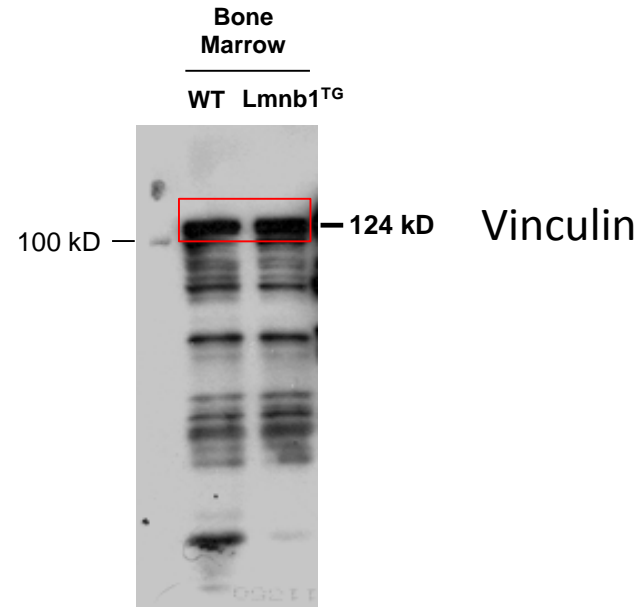

Supplement: EMBR-21-e48779-s002.pdf [file EMBR-21-e48779-s002.pdf]

# Source data for Figure 3C-D

 Cropped area

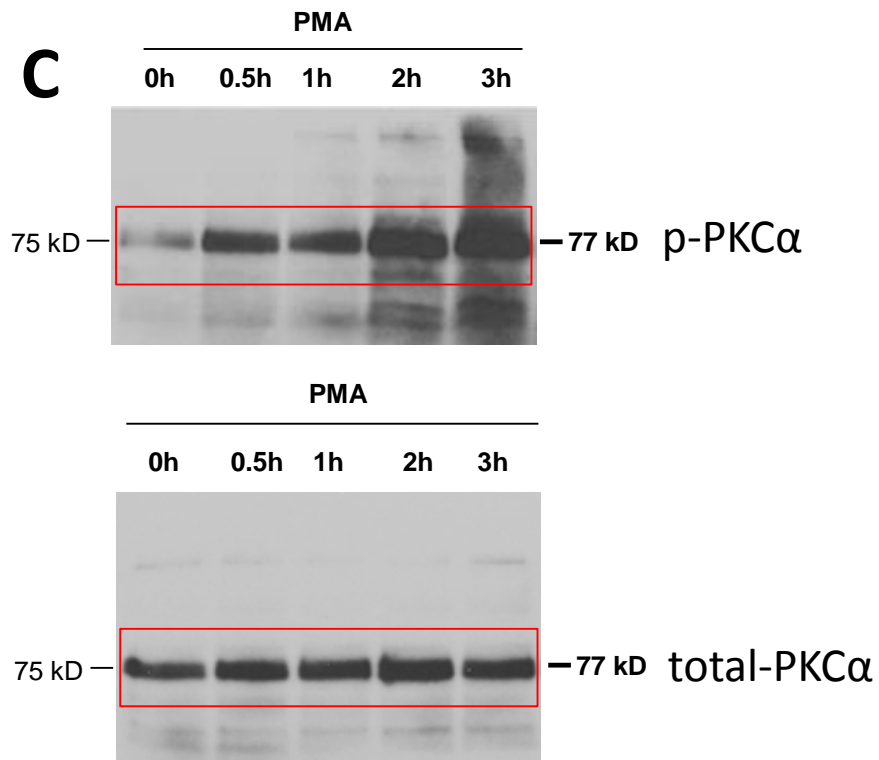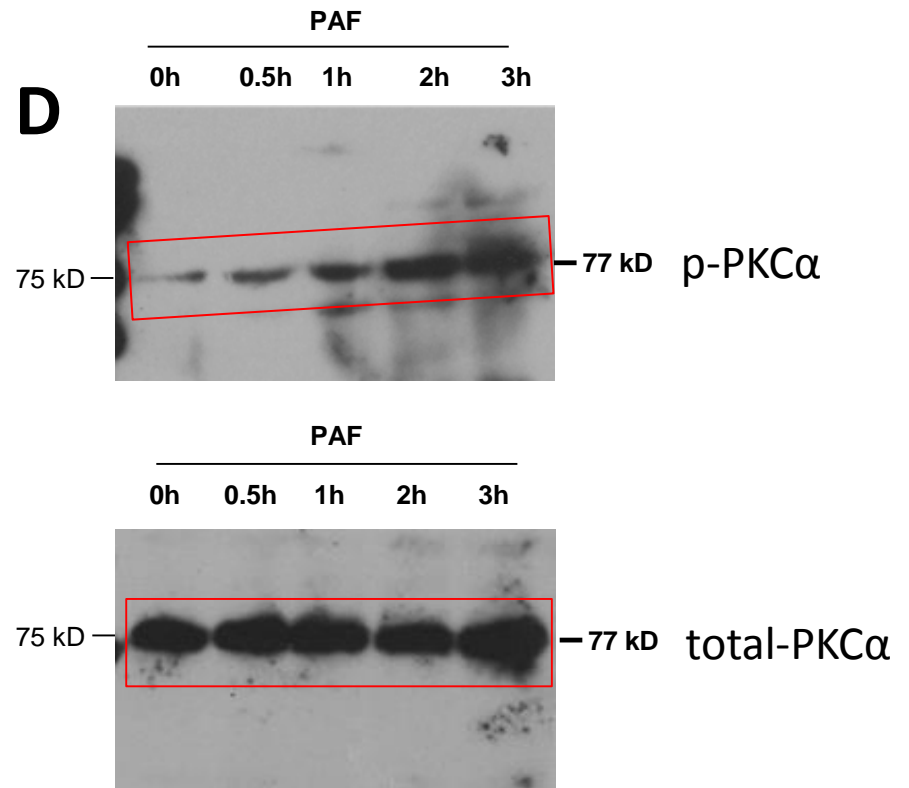

Supplement: EMBR-21-e48779-s004.pdf [file EMBR-21-e48779-s004.pdf]

# Source data for Figure 4A

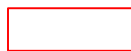

Cropped area

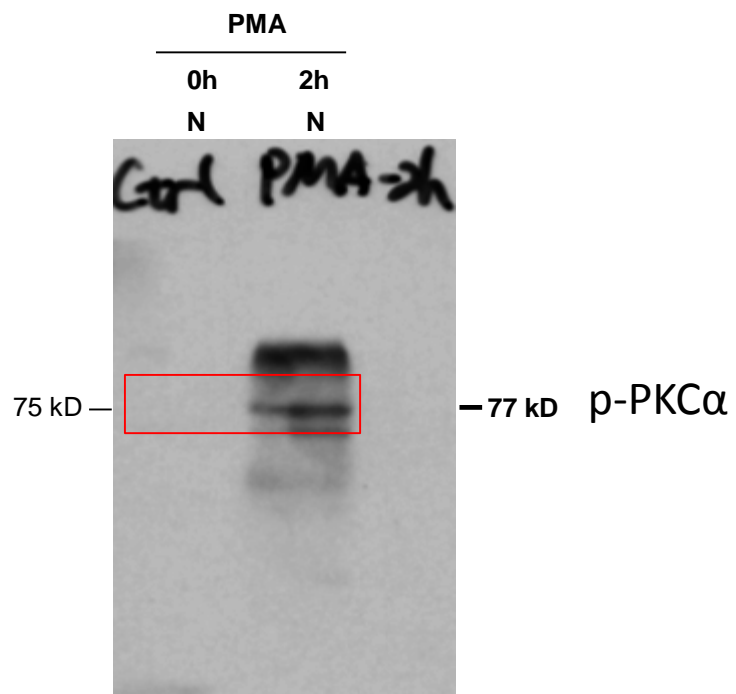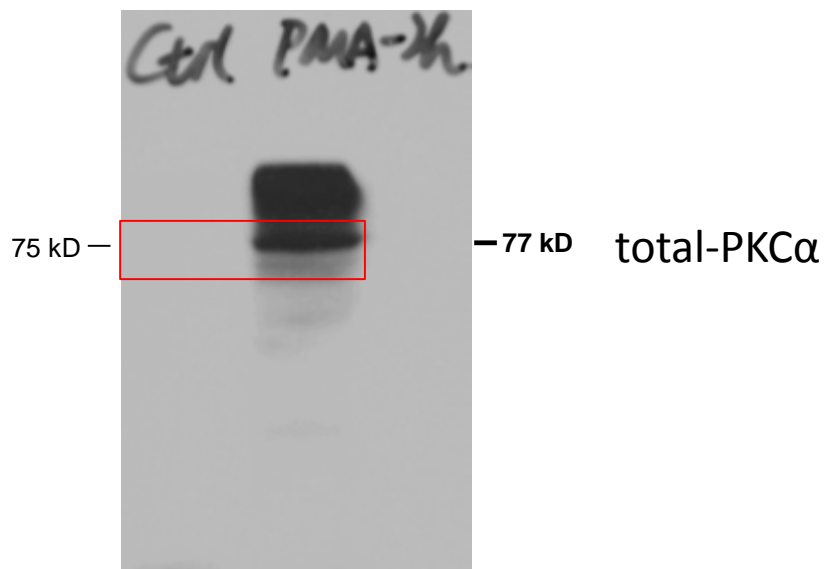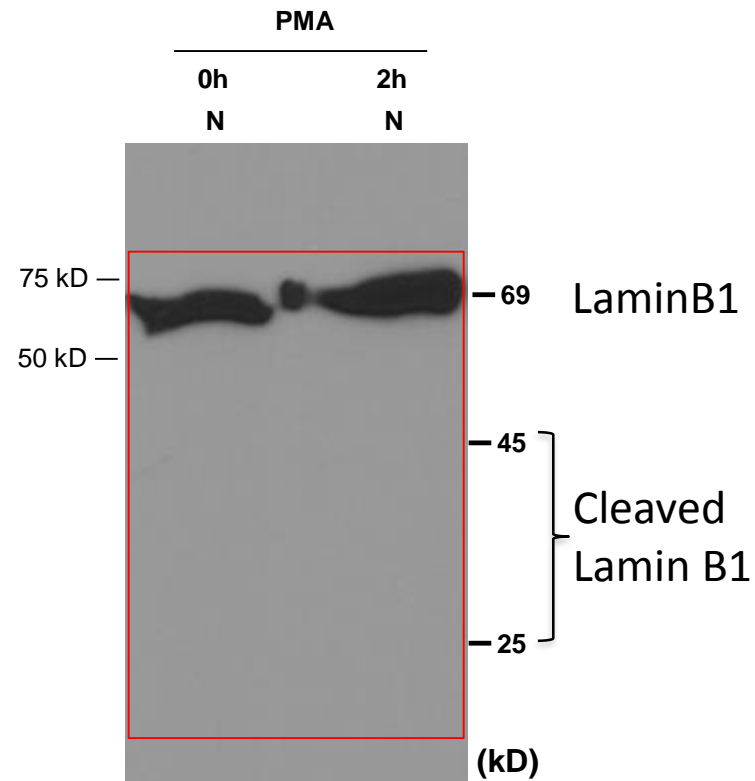

# Source data for Figure 4C,D

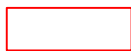

# Cropped area

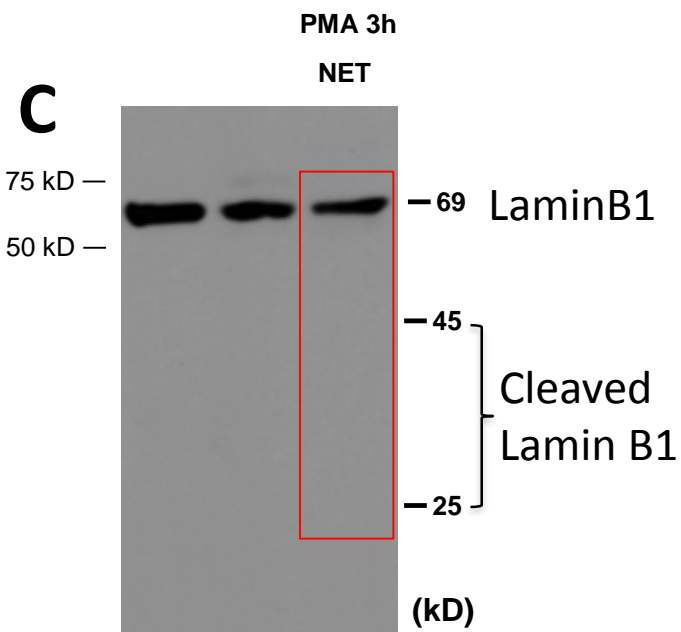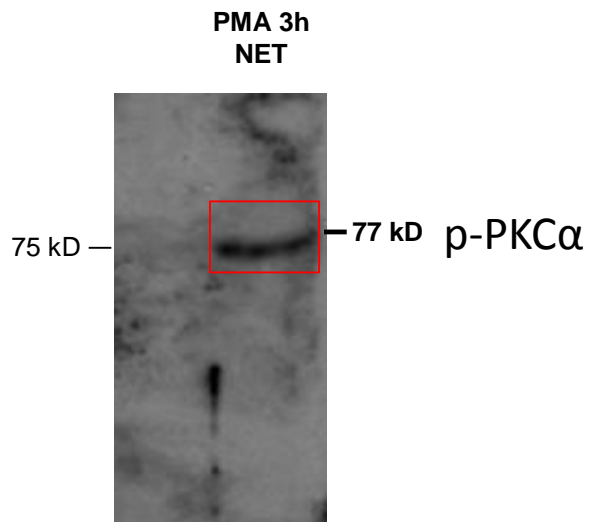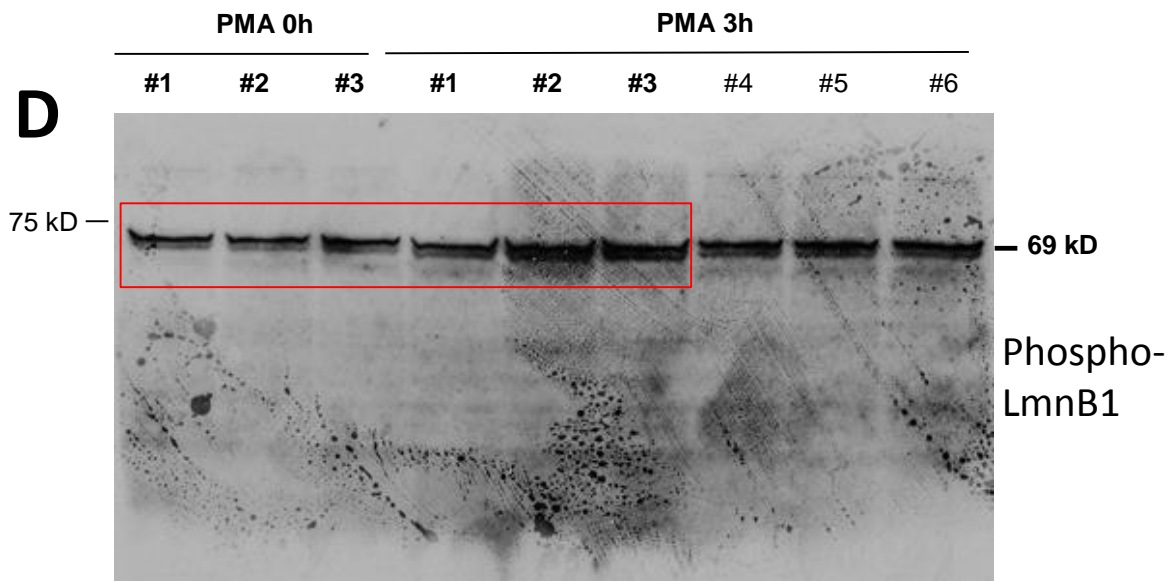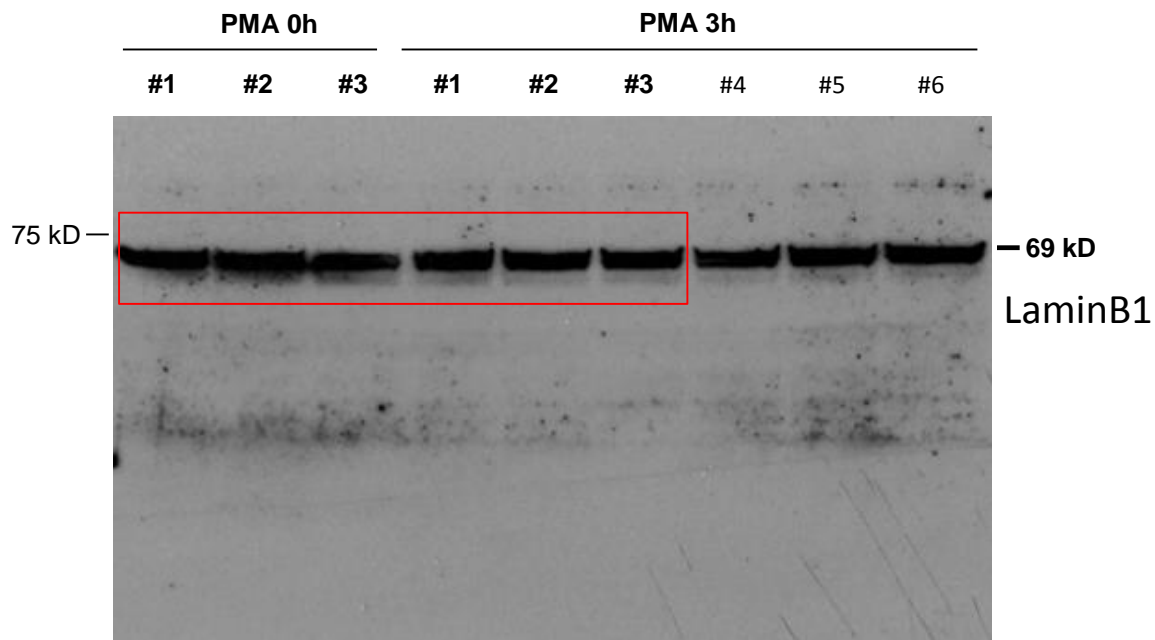

Supplement: EMBR-21-e48779-s005.pdf [file EMBR-21-e48779-s005.pdf]

Source data for Figure 5A-B

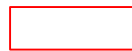

Cropped area

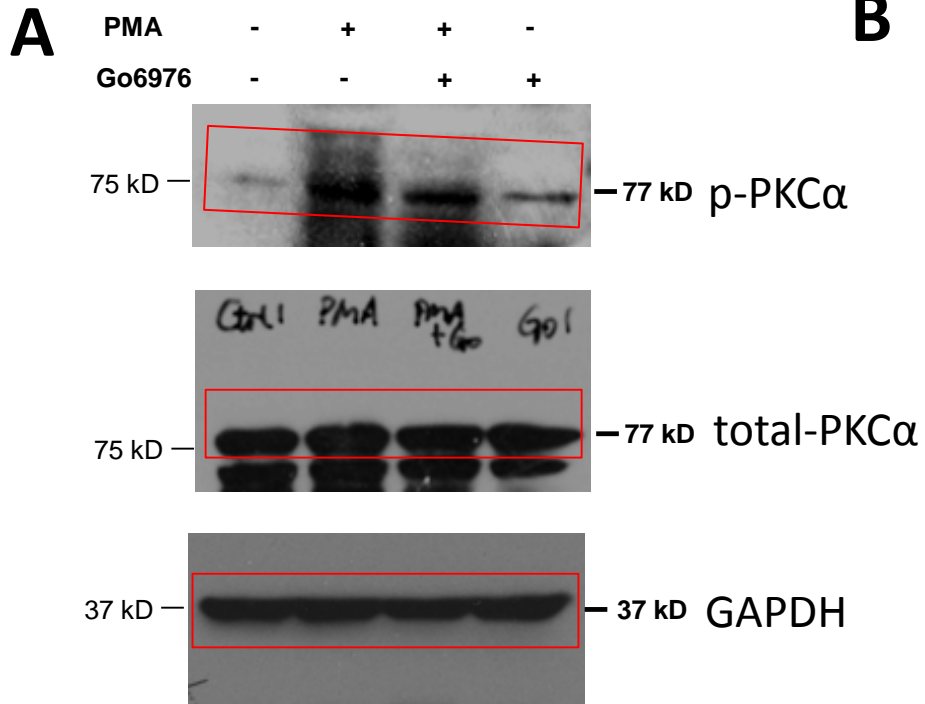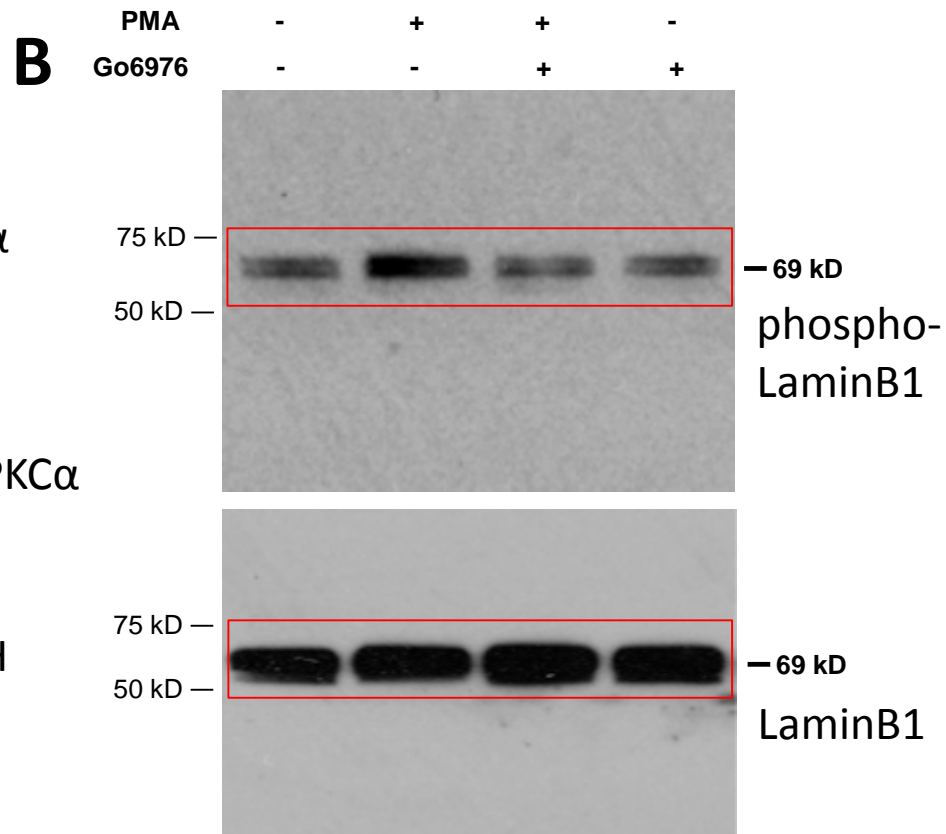

Supplement: EMBR-21-e48779-s006.pdf [file EMBR-21-e48779-s006.pdf]

Source data for Figure 6A-B  Cropped area

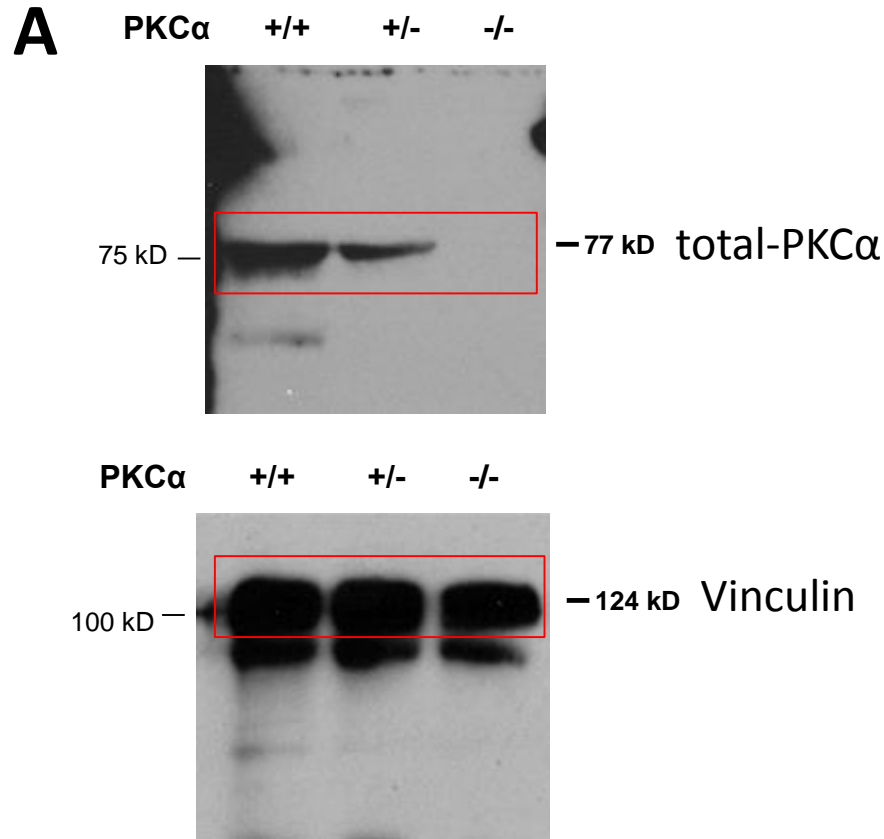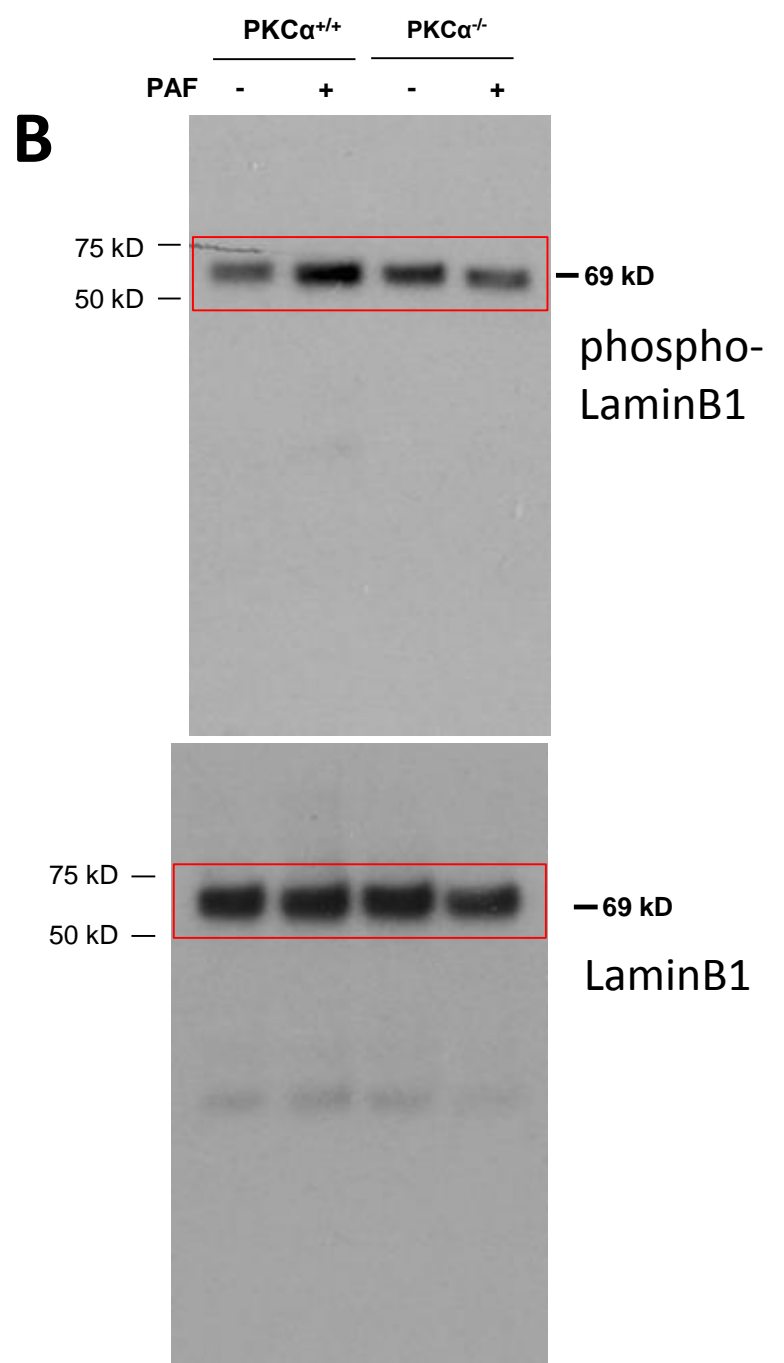

Supplement: EMBR-21-e48779-s007.pdf [file EMBR-21-e48779-s007.pdf]
